# Supplementary material
Source: Research Square preprint supplement (doi:10.21203/rs.3.rs-9306715/v1)
Supplement: Supplementary file 1 [file 450a43f70f04c6d7d283974e.docx]

Supplementary Information

**Beyond the Last Sip: Unlocking Antioxidant Potential from Spent Yerba Mate through Thermochemical Pathways.**

María Milagros Vicho1‡, Débora A. López1‡, Renata Bence2‡, Rodrigo E. Dominguez1,3‡, María Verónica Baroni2, Natividad Herrera Cano2, and E. Laura Moyano1*

1 INFIQC/CONICET - Departamento de Química Orgánica, Facultad de Ciencias Químicas, Universidad Nacional de Córdoba, Córdoba, Argentina.

2 ICYTAC/CONICET - Departamento de Química Orgánica, Facultad de Ciencias Químicas, Universidad Nacional de Córdoba, Córdoba, Argentina.

3 Present address: Medical Devices and Methods Laboratory, Health Futures Center, Arizona State University, 6161 E. Mayo Blvd., Phoenix, AZ 85054, U.S.A.

‡These authors contributed equally to this work.

*Corresponding author email address: [e.laura.moyano@unc.edu.ar](mailto:e.laura.moyano@unc.edu.ar)

This file contains 3 pages, including **Table S1, Fig. S1, Fig. S2 and Table S2.**

**Table S1.** UPLC-MS/MS Triple Quadrupole Acquisition Parameters for Analyzed Compounds.

| Name | Ret time (min) | Precursor ion (m/z) | | CE (eV) | Cone (V) | Quantification trace |
| --- | --- | --- | --- | --- | --- | --- |
| [M+H]⁺ | [M–H]⁻ |
| Gallic acid | 0.96 |  | 169 | 15 | 35 | 169 > 125 |
| Theobromine | 1.97 | 181 |  | 18 | 16 | 181 > 138 |
| Protocatechuic acid (PCA) | 2.68 |  | 153 | 15 | 35 | 153 > 109 |
| 3-CQA | 2.74 |  | 353 | 15 | 20 | 353 > 191 |
| 5-CQA | 3.72 |  | 353 | 15 | 20 | 353 > 191 |
| 4-CQA | 3.8 |  | 353 | 15 | 20 | 353 > 173 |
| Caffein | 3.82 | 195 |  | 18 | 16 | 195 > 138 |
| 3-FQA | 3.87 |  | 367 | 15 | 20 | 367 > 193 |
| Caffeic acid | 4.16 | 181 |  | 8 | 22 | 181 > 163 |
| 5-FQA | 4.49 |  | 367 | 15 | 20 | 367 > 173 |
| Rutin | 4.74 |  | 609 | 22 | 80 | 609 > 300 |
| Isoquercetin | 4.95 |  | 463 | 22 | 80 | 463 > 300 |
| Kaempf-rutinoside | 5.06 | 593 |  | 22 | 30 | 593 > 285 |

**Table S2.** Properties of unused yerba mate (YM).

| **Analysis** | | **YM** |
| --- | --- | --- |
| Proximate analysis (wt.%)a | Ash | 4.05 |
| Fixed carbon | 19.82 |
| Volatile matter | 76.13 |
| Ultimate analysis (wt.%)a | C | 80.83 |
| H | 7.20 |
| N | 2.05 |
| Ob | 5.87 |

a Dry basis.

b Calculated by difference.


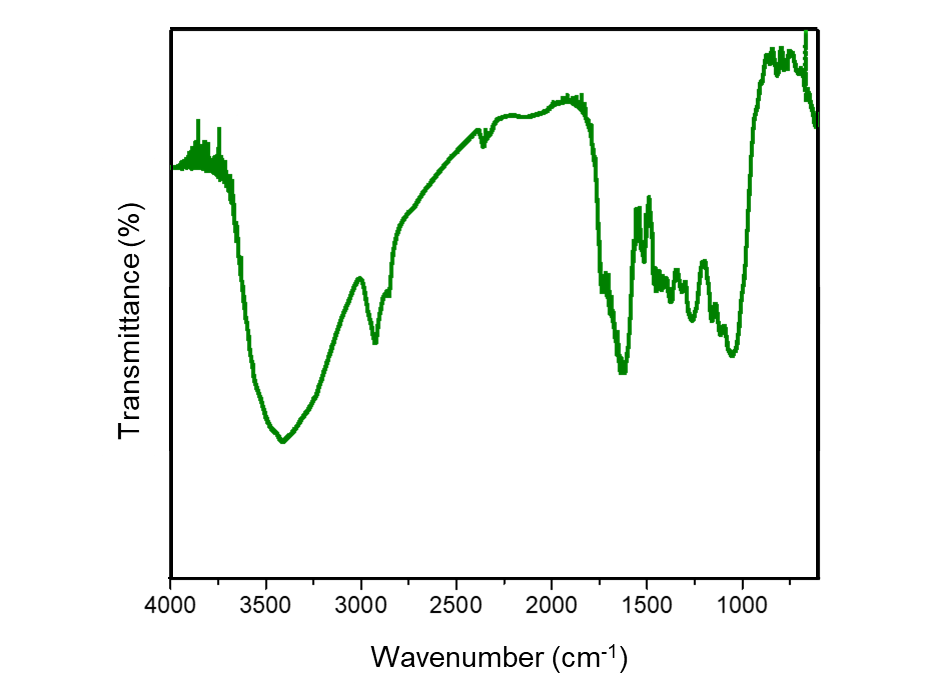


**Fig. S1.** FT-IR spectra of unused yerba mate.


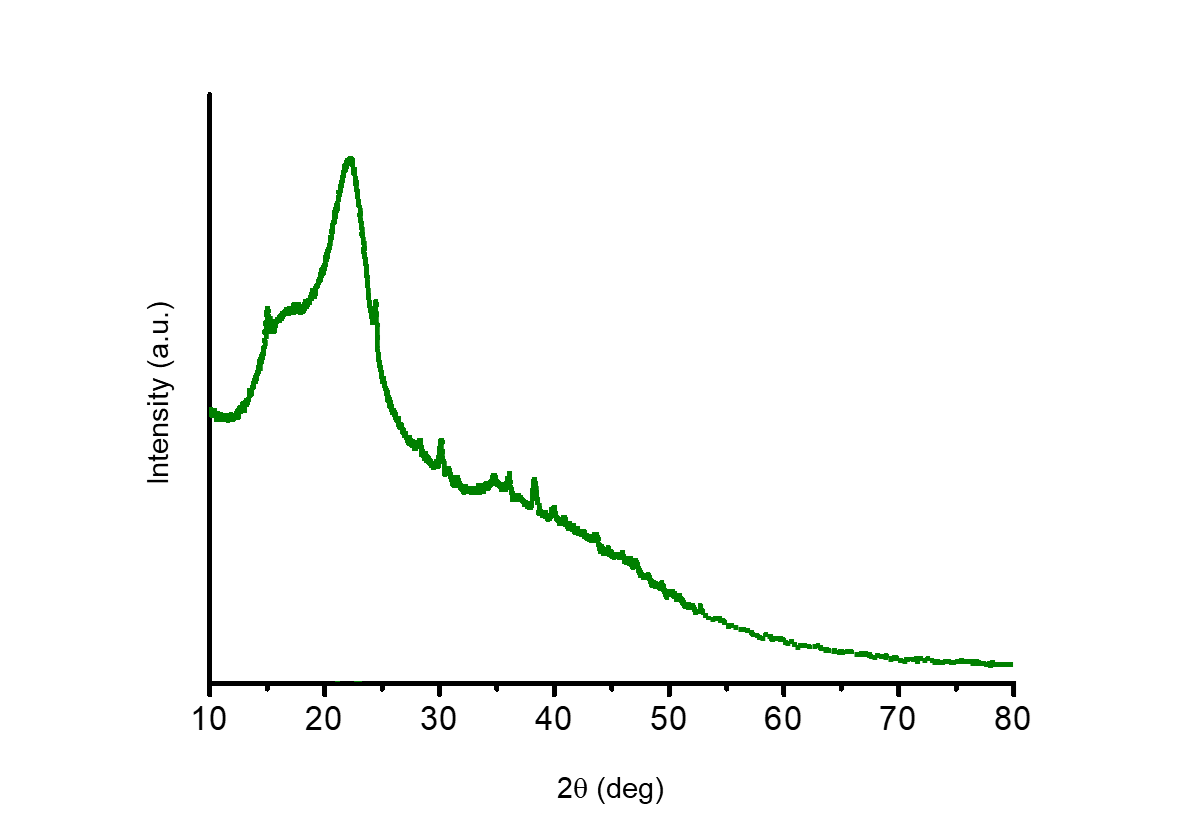


**Fig. S2.** X-Ray Diffraction Pattern of unsued yerba mate.
